# Supplementary material
Source: HighWire-hosted journal article supplement (https://ebm.bmj.com/content/28/2/93)
Supplement: inline-supplementary-material-7 [file inline-supplementary-material-7.pdf]

## Additional file 6: Outcome measurement instruments

| Outcome                                    | Measurement                                                                                                                                                                                                                                                                                                               |
|--------------------------------------------|---------------------------------------------------------------------------------------------------------------------------------------------------------------------------------------------------------------------------------------------------------------------------------------------------------------------------|
| Death                                      | N/S                                                                                                                                                                                                                                                                                                                       |
| Oropharyngeal dysphagia severity           | VFS: DOSS (O'Neil et al., 1999); FDS (Han et al., 1999); VDS-total; -oral; -pharyngeal (Kim et al., 2012)<br>FEES: score 0-108; sum of 5 scores; sum of 4 scores<br>Dysphagia scale (no reference, from Wei et al. 2017);<br>SSA (Perry et al., 2001); CSE                                                                |
| Drooling                                   | UPDRS II: 5-point scale<br>DSFS: 5- and 4-point scale (Thomas-Stonell & Greenberg, 1988)                                                                                                                                                                                                                                  |
| Salivary pooling                           | FEES: 4-point scale                                                                                                                                                                                                                                                                                                       |
| Orolingual bolus control                   | VFS: 5-point scale<br>FEES: 3-point-scale, 5-point scale                                                                                                                                                                                                                                                                  |
| Oral bolus transport                       | VFS: 3-point scale                                                                                                                                                                                                                                                                                                        |
| Swallowing related lingual movement        | VFS: 5-point scale                                                                                                                                                                                                                                                                                                        |
| Timing of oropharyngeal swallow components | VFS<br>FEES: 4-point scale                                                                                                                                                                                                                                                                                                |
| Laryngeal elevation                        | FEES: 3-point scale                                                                                                                                                                                                                                                                                                       |
| Laryngeal sensation                        | FEES: touching epiglottis or arytenoids with endoscope, 4-point scale                                                                                                                                                                                                                                                     |
| Swallowing related hyoid bone movement     | VFS: in milli- or centimeters                                                                                                                                                                                                                                                                                             |
| Initiation of pharyngeal swallow           | VFS: 3-point scale<br>FEES: endoscopic whiteout, 4-point scale; 3-point scale<br>EMG (submental muscles) in milliseconds                                                                                                                                                                                                  |
| Postswallow oral residue                   | VFS: 5-point scale                                                                                                                                                                                                                                                                                                        |
| Postswallow pharyngeal residue             | VFS: 3-point scale<br>FEES: 4-point scale; 5-point scale                                                                                                                                                                                                                                                                  |
| Postswallow pharyngeal pooling             | VFS: 3-point scale<br>FEES: 3-point scale                                                                                                                                                                                                                                                                                 |
| Piecemeal deglutition                      | VFS: 5-point scale<br>FEES: 5-point scale                                                                                                                                                                                                                                                                                 |
| Penetration/Aspiration                     | VFS: PAS, 8-point scale (Rosenbek et al., 1996)<br>FEES: PAS, 8-point scale (Rosenbek et al., 1996);<br>penetration/aspiration before/after swallowing, 4-point scale                                                                                                                                                     |
| Cortical reorganization                    | Magnetoencephalography: data filtered within theta (4–8 Hz), alpha (8–13 Hz), beta (13–30 Hz), low-gamma, (30–60 Hz), high-gamma (60–80 Hz) frequency bands; in all frequency bands, performance of source localization of each subject's swallowing-associated event-related desynchronization (ERD) of cortical rhythms |
| Motor evoked potential                     | Electromyography                                                                                                                                                                                                                                                                                                          |
| Overall motor symptoms                     | H&Y; UPDRS III                                                                                                                                                                                                                                                                                                            |

|                                               |                                                                                                                                                                                                                                                                                                 |
|-----------------------------------------------|-------------------------------------------------------------------------------------------------------------------------------------------------------------------------------------------------------------------------------------------------------------------------------------------------|
| Tremor                                        | UPDRS III                                                                                                                                                                                                                                                                                       |
| Rigidity                                      | UPDRS III                                                                                                                                                                                                                                                                                       |
| Bradykinesia                                  | UPDRS III                                                                                                                                                                                                                                                                                       |
| Axial symptoms                                | UPDRS III                                                                                                                                                                                                                                                                                       |
| Freezing of gait                              | Stand-walk-test (no reference, from Xie et al., 2018)                                                                                                                                                                                                                                           |
| Phonation                                     | Maximum phonation time on /aa/ in seconds                                                                                                                                                                                                                                                       |
| Loudness                                      | Maximum phonation decibel (dB) on /aa/                                                                                                                                                                                                                                                          |
| Level of oral intake                          | FOIS (Crary et al., 2005)                                                                                                                                                                                                                                                                       |
| Aspiration pneumonia                          | Chest radiography<br>Clinical evaluation: $\geq 3$ of the following: sustained fever (temperature $> 100^{\circ}\text{F}$ [ $38^{\circ}\text{C}$ ]), rales or rhonchi on chest auscultation, sputum Gram stain showing substantial leukocytes, or sputum culture showing a respiratory pathogen |
| Activities of daily living                    | IADL (Lawton et al., 1969)                                                                                                                                                                                                                                                                      |
| Pleasure of oral intake                       | POE (Manor et al., 2013)                                                                                                                                                                                                                                                                        |
| Swallowing related quality of life            | SWAL-QOL (McHorney et al., 2002), MDADI (Chen et al., 2001)                                                                                                                                                                                                                                     |
| Self-perception of swallowing                 | SDQ (Manor et al., 2007), DSS (Tohara et al., 2003), A-DHI (Farahat et al., 2014)                                                                                                                                                                                                               |
| Self-perception of walking                    | FOG questionnaire (Giladi et al., 2009)                                                                                                                                                                                                                                                         |
| Self-perception of activities of daily living | Activities of Daily Living Scale (Brown et al., 1989)                                                                                                                                                                                                                                           |
| Patient's satisfaction with intervention      | Interview: rated as easy/pleasant, average, or difficult/unpleasant<br>SWAL-CARE (McHorney et al., 2002)                                                                                                                                                                                        |
| Patient's adherence to intervention           | Assessed across meals, classified monthly as 0% - 25%, 26% - 50%, 51% - 75%, or 76% - 100%                                                                                                                                                                                                      |
| Hospitalization                               | N/S                                                                                                                                                                                                                                                                                             |
| Adverse events                                | Clinical evaluation                                                                                                                                                                                                                                                                             |

A-DHI = Arabic Dysphagia Handicap Index, CSE = Clinical Swallow Evaluation, DOSS = Dysphagia Outcome and Severity Scale, DSFS = Drooling Severity and Frequency Scale, DSS = Dysphagia Severity Scale, EMG = Electromyography, FDS = Functional Dysphagia Scale, FEES = Fiberoptic Endoscopic Evaluation of Swallowing, FOG = Freezing of Gait, FOIS = Functional Oral Intake Scale, H&Y = Hoehn & Yahr, IADL = Instrumental Activities of Daily Living, MDADI = MD Anderson Dysphagia Inventory, N/S = not specified, PAS = Penetration-Aspiration-Scale, POE = Pleasure of Eating, SDQ = Swallowing Disturbance Questionnaire, SSA = Standardized Swallowing Assessment, SWAL-CARE = Swallowing Quality of Care Questionnaire, SWAL-QOL = Swallowing Quality of Life Questionnaire, UPDRS = Unified Parkinson's Disease Rating Scale, VDS = Videofluoroscopic Dysphagia Scale, VFS = Videofluoroscopic Evaluation of Swallowing
